# Supplementary material
Source: Copernicus journal article supplement (doi:10.5194/egusphere-2023-1165)
Supplement: Supplementary file 1 [file egusphere-2023-1165-supplement-version1.pdf]

Supplementary Data

1. Comparison between Upper Acorn Woman Lake and Lower Acorn Woman Lake for the identification of a horizon representing 1964. CT number = radiodensity data.

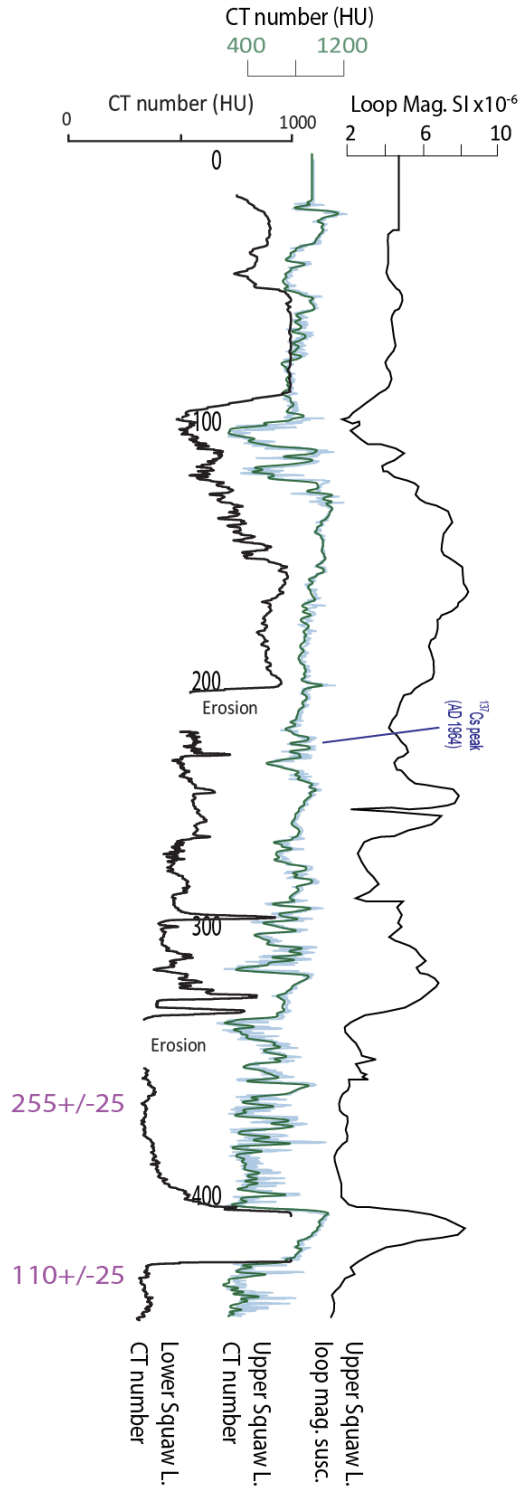

## 2. XRD Data

### a. JADE software output:

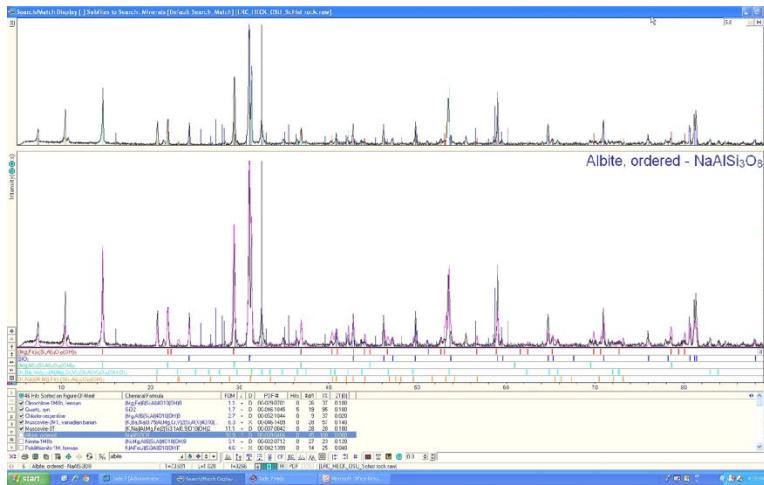

Schist grab2

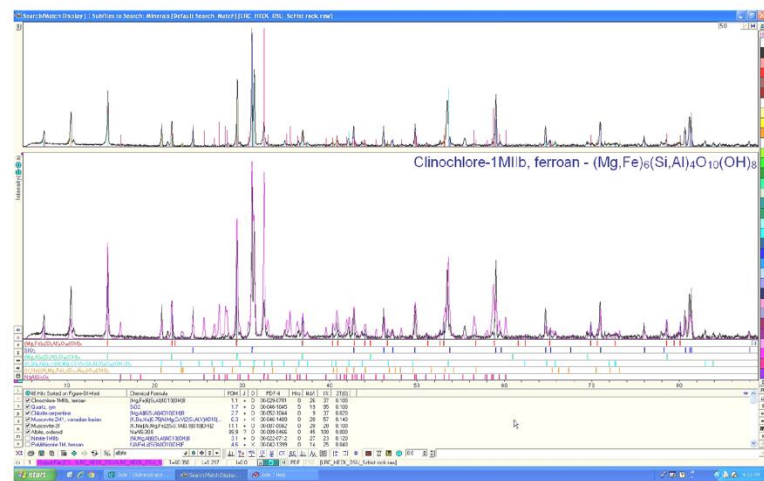

Schist grab1

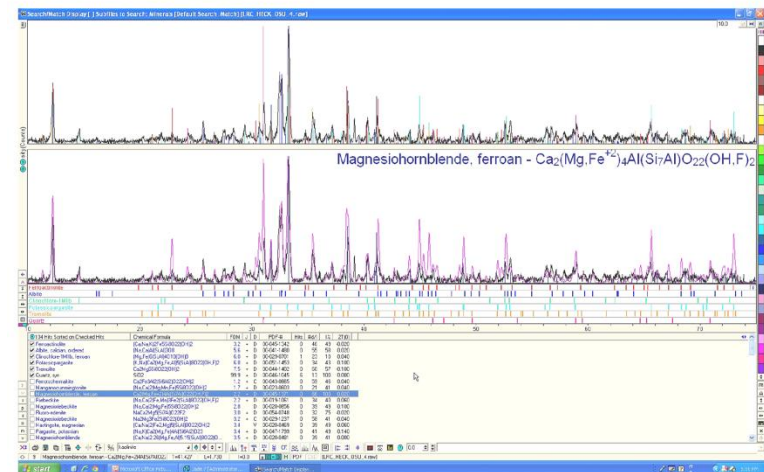

Squaw Peak rock

b. Graphs of XRD data from sediment core samples (see data at the end of this supplement):

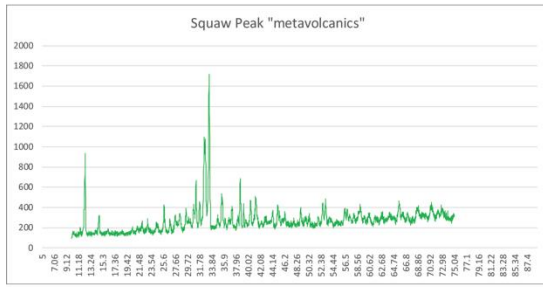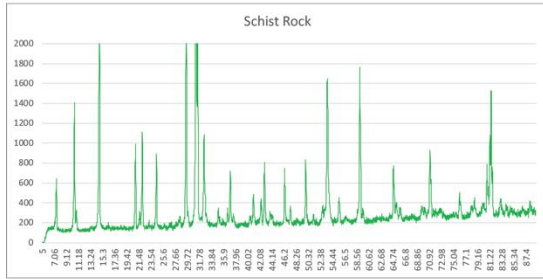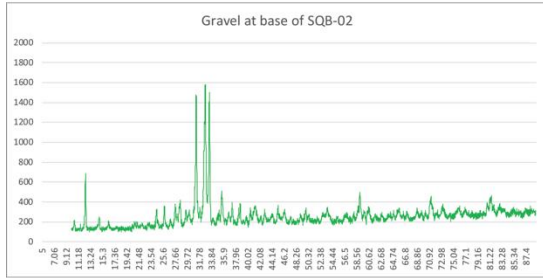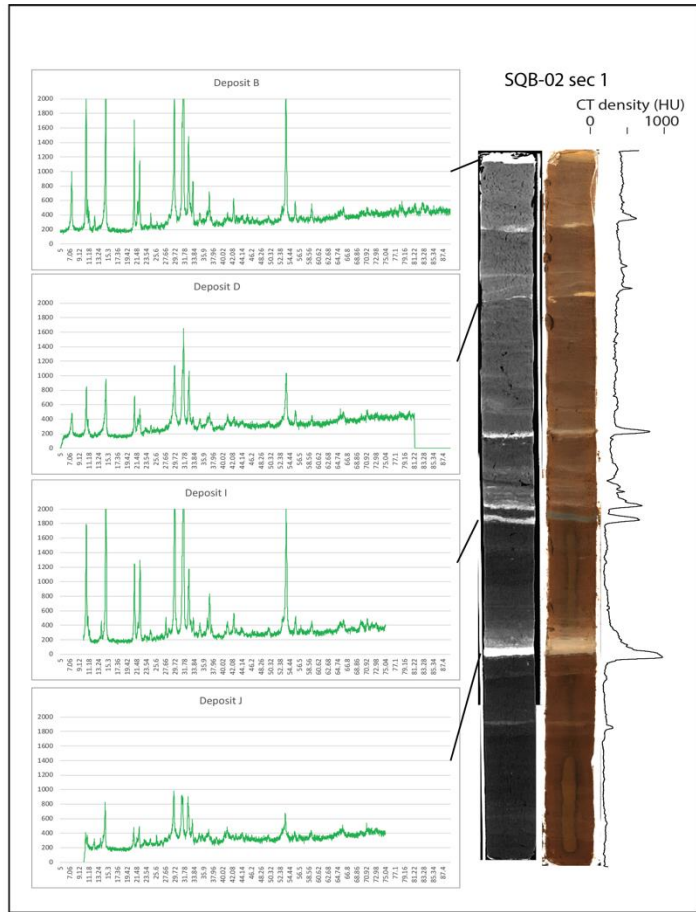

3. The 1873 earthquake and regional faults.  
 Felt reports do not show dissipation in intensity with distance from the Intensity Centre.

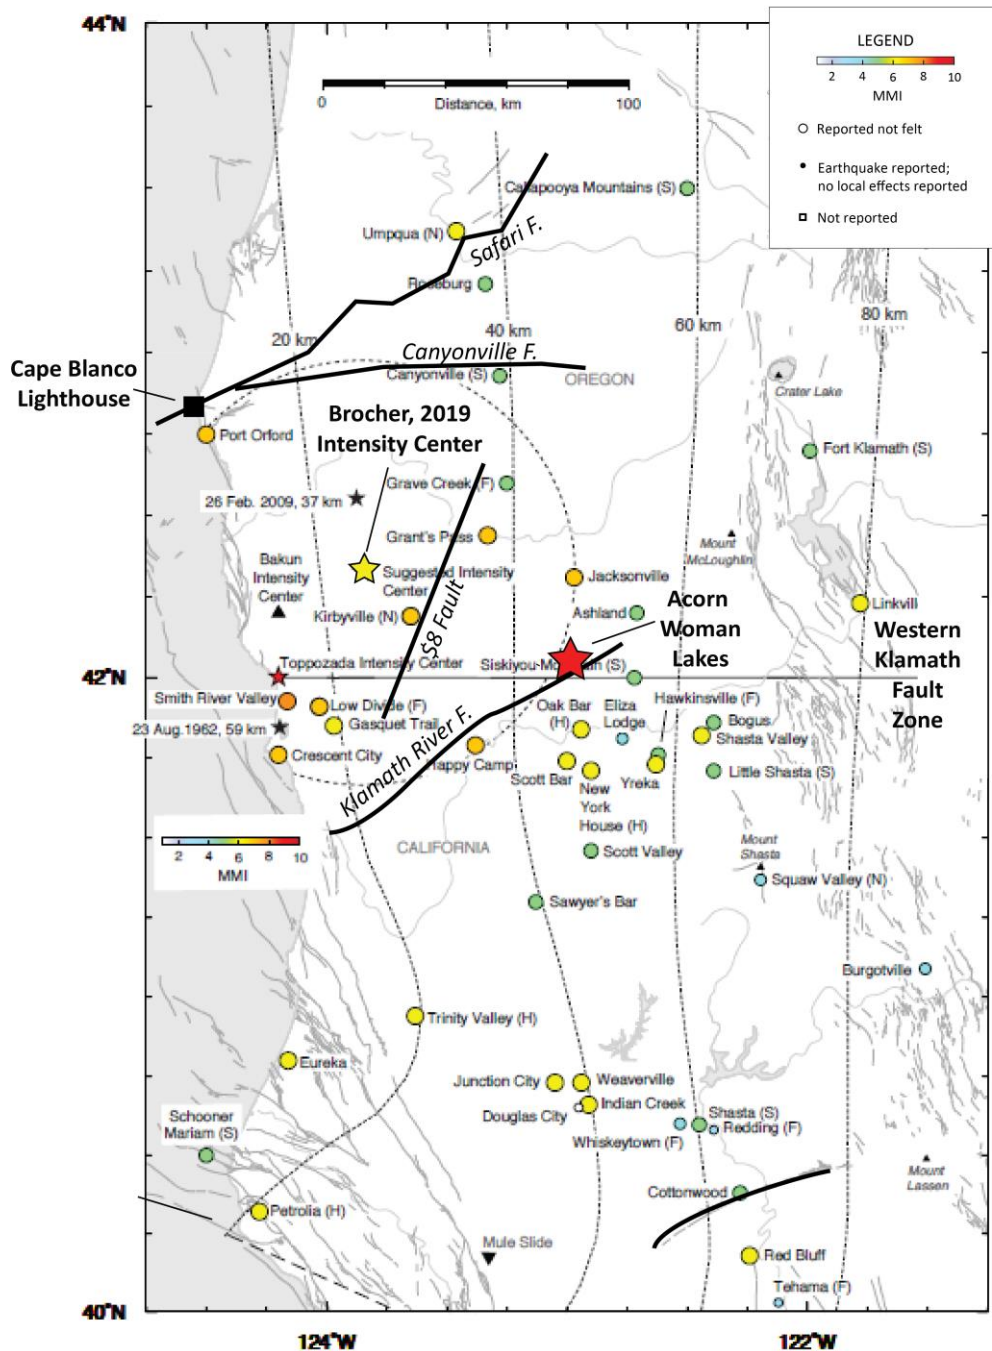

The figure above was adapted from a map of felt reports created by Thomas Brocher (provided as personal communication, 2019) with crustal faults (Klamath River, Canyonville, and Safari Faults) from Wells et al., 2017, and the \$8 fault (Cave Junction Fault) from von Dassow (2018) placed on it. The large red star shows the location of Acorn Woman Lakes. MMI values in the Brocher map are coded by color based on newspaper reports and Felt (F), Light (L), Heavy (H),

and Severe (S) are intensities assigned by Topozada et al. (1981). Reinterpretations of the Felt reports led to minor reassignments of MMI values and the Brocher intensity centre (identified by the yellow star). Also shown are the intensity centers of Topozada et al. (1981) and Bakun (2000).

T. Brocher estimated his intensity centre as follows:

“To estimate an intensity center based on the new intensities, I fit a circle of 70 km radius to enclose all of the MMI VII and VIII intensities, including the new intensity VII assigned to Kirbyville, Oregon. This center is located to the east of both previously proposed intensity centers (Figure 2). Subject to the caveat that we lack intensity observations offshore in this region, the center of this circle lies at 42.3°N and 123.9°W, about 40 km northeast of, but within the 60-km confidence region of the intensity center determined by Topozada and others (1981). This intensity center lies about 35 km to the north east but is within the 67% confidence limit of Bakun’s (2000) intensity center.”

The red fault lines shown on the map above were created by tracing linear features in the topography bounding regions of uplift and sediment ponding (similar to the Eight Dollar Fault setting, von Dassow, 2018). They appear to be conjugate Riedel faults, which are the result of strain and precede strike-slip fault formation. The Klamath Mountain Province is not well understood, and most of these faults are not previously mapped active faults.

4. XRD Data (graphed in 2a,b above):

**SQB-02**

| 2Theta | Deposit B | Deposit D | Deposit I | Deposit J | basal gravel | Schist | Squaw Peak |
|--------|-----------|-----------|-----------|-----------|--------------|--------|------------|
| 5      | 172       | 5         |           |           |              | 1      |            |
| 5.02   | 180       | 2         |           |           |              | 4      |            |
| 5.04   | 176       | 5         |           |           |              | 1      |            |
| 5.06   | 166       | 4         |           |           |              | 4      |            |
| 5.08   | 189       | 5         |           |           |              | 1      |            |
| 5.1    | 162       | 2         |           |           |              | 2      |            |
| 5.12   | 164       | 10        |           |           |              | 0      |            |
| 5.14   | 155       | 6         |           |           |              | 1      |            |
| 5.16   | 171       | 12        |           |           |              | 5      |            |
| 5.18   | 163       | 16        |           |           |              | 2      |            |
| 5.2    | 173       | 21        |           |           |              | 1      |            |
| 5.22   | 166       | 38        |           |           |              | 5      |            |
| 5.24   | 188       | 34        |           |           |              | 1      |            |
| 5.26   | 191       | 42        |           |           |              | 1      |            |
| 5.28   | 176       | 40        |           |           |              | 13     |            |
| 5.3    | 158       | 45        |           |           |              | 8      |            |
| 5.32   | 169       | 39        |           |           |              | 13     |            |
| 5.34   | 175       | 57        |           |           |              | 20     |            |
| 5.36   | 173       | 54        |           |           |              | 24     |            |
| 5.38   | 179       | 56        |           |           |              | 27     |            |
| 5.4    | 175       | 70        |           |           |              | 28     |            |
| 5.42   | 180       | 69        |           |           |              | 38     |            |
| 5.44   | 182       | 89        |           |           |              | 47     |            |
| 5.46   | 175       | 70        |           |           |              | 39     |            |
| 5.48   | 188       | 110       |           |           |              | 39     |            |
| 5.5    | 198       | 88        |           |           |              | 54     |            |
| 5.52   | 179       | 98        |           |           |              | 61     |            |
| 5.54   | 162       | 101       |           |           |              | 56     |            |
| 5.56   | 163       | 126       |           |           |              | 54     |            |
| 5.58   | 165       | 123       |           |           |              | 77     |            |
| 5.6    | 181       | 117       |           |           |              | 83     |            |
| 5.62   | 141       | 114       |           |           |              | 73     |            |
| 5.64   | 158       | 116       |           |           |              | 78     |            |
| 5.66   | 167       | 146       |           |           |              | 95     |            |
| 5.68   | 185       | 135       |           |           |              | 88     |            |
| 5.7    | 180       | 127       |           |           |              | 88     |            |
| 5.72   | 170       | 166       |           |           |              | 104    |            |
| 5.74   | 178       | 156       |           |           |              | 121    |            |
| 5.76   | 167       | 143       |           |           |              | 100    |            |
| 5.78   | 166       | 169       |           |           |              | 109    |            |
| 5.8    | 183       | 155       |           |           |              | 110    |            |
| 5.82   | 183       | 158       |           |           |              | 115    |            |
| 5.84   | 175       | 150       |           |           |              | 121    |            |

|      |     |     |     |
|------|-----|-----|-----|
| 5.86 | 183 | 176 | 125 |
| 5.88 | 189 | 127 | 136 |
| 5.9  | 176 | 160 | 138 |
| 5.92 | 159 | 174 | 151 |
| 5.94 | 177 | 164 | 136 |
| 5.96 | 165 | 144 | 126 |
| 5.98 | 180 | 158 | 126 |
| 6    | 182 | 159 | 151 |
| 6.02 | 178 | 162 | 115 |
| 6.04 | 195 | 156 | 124 |
| 6.06 | 184 | 164 | 138 |
| 6.08 | 180 | 167 | 137 |
| 6.1  | 191 | 178 | 135 |
| 6.12 | 188 | 137 | 125 |
| 6.14 | 198 | 182 | 155 |
| 6.16 | 194 | 146 | 149 |
| 6.18 | 180 | 174 | 145 |
| 6.2  | 165 | 186 | 144 |
| 6.22 | 172 | 139 | 151 |
| 6.24 | 170 | 153 | 156 |
| 6.26 | 224 | 166 | 143 |
| 6.28 | 212 | 177 | 147 |
| 6.3  | 186 | 173 | 136 |
| 6.32 | 211 | 162 | 142 |
| 6.34 | 179 | 172 | 157 |
| 6.36 | 192 | 163 | 124 |
| 6.38 | 203 | 159 | 146 |
| 6.4  | 200 | 160 | 133 |
| 6.42 | 197 | 147 | 144 |
| 6.44 | 186 | 169 | 148 |
| 6.46 | 211 | 147 | 135 |
| 6.48 | 196 | 191 | 168 |
| 6.5  | 207 | 161 | 135 |
| 6.52 | 199 | 188 | 165 |
| 6.54 | 201 | 184 | 147 |
| 6.56 | 213 | 167 | 156 |
| 6.58 | 216 | 173 | 148 |
| 6.6  | 202 | 168 | 131 |
| 6.62 | 219 | 200 | 143 |
| 6.64 | 204 | 177 | 162 |
| 6.66 | 194 | 164 | 130 |
| 6.68 | 221 | 157 | 154 |
| 6.7  | 194 | 189 | 157 |
| 6.72 | 228 | 180 | 166 |
| 6.74 | 227 | 189 | 134 |
| 6.76 | 188 | 176 | 160 |
| 6.78 | 199 | 185 | 145 |
| 6.8  | 221 | 211 | 144 |
| 6.82 | 210 | 182 | 140 |

|      |      |     |     |
|------|------|-----|-----|
| 6.84 | 244  | 182 | 136 |
| 6.86 | 226  | 197 | 152 |
| 6.88 | 206  | 211 | 146 |
| 6.9  | 244  | 184 | 134 |
| 6.92 | 230  | 210 | 154 |
| 6.94 | 229  | 207 | 158 |
| 6.96 | 226  | 207 | 155 |
| 6.98 | 239  | 232 | 168 |
| 7    | 256  | 231 | 184 |
| 7.02 | 263  | 238 | 159 |
| 7.04 | 283  | 224 | 168 |
| 7.06 | 285  | 219 | 162 |
| 7.08 | 276  | 201 | 189 |
| 7.1  | 300  | 225 | 215 |
| 7.12 | 335  | 272 | 199 |
| 7.14 | 289  | 247 | 190 |
| 7.16 | 341  | 270 | 184 |
| 7.18 | 366  | 277 | 252 |
| 7.2  | 345  | 287 | 247 |
| 7.22 | 402  | 258 | 256 |
| 7.24 | 436  | 265 | 310 |
| 7.26 | 477  | 292 | 329 |
| 7.28 | 445  | 301 | 347 |
| 7.3  | 523  | 284 | 435 |
| 7.32 | 545  | 347 | 495 |
| 7.34 | 582  | 347 | 549 |
| 7.36 | 674  | 392 | 641 |
| 7.38 | 682  | 381 | 581 |
| 7.4  | 804  | 385 | 603 |
| 7.42 | 774  | 411 | 510 |
| 7.44 | 863  | 401 | 390 |
| 7.46 | 924  | 441 | 290 |
| 7.48 | 888  | 431 | 229 |
| 7.5  | 1001 | 482 | 183 |
| 7.52 | 903  | 452 | 137 |
| 7.54 | 778  | 449 | 128 |
| 7.56 | 720  | 476 | 149 |
| 7.58 | 576  | 443 | 139 |
| 7.6  | 449  | 416 | 148 |
| 7.62 | 330  | 374 | 118 |
| 7.64 | 343  | 361 | 132 |
| 7.66 | 299  | 296 | 133 |
| 7.68 | 285  | 257 | 125 |
| 7.7  | 272  | 263 | 160 |
| 7.72 | 261  | 211 | 140 |
| 7.74 | 240  | 237 | 130 |
| 7.76 | 246  | 230 | 138 |
| 7.78 | 243  | 208 | 134 |
| 7.8  | 251  | 204 | 124 |



|      |     |     |     |
|------|-----|-----|-----|
| 7.82 | 247 | 201 | 144 |
| 7.84 | 242 | 187 | 128 |
| 7.86 | 265 | 220 | 124 |
| 7.88 | 205 | 198 | 117 |
| 7.9  | 227 | 208 | 106 |
| 7.92 | 208 | 192 | 111 |
| 7.94 | 212 | 189 | 126 |
| 7.96 | 224 | 182 | 136 |
| 7.98 | 228 | 176 | 122 |
| 8    | 247 | 181 | 138 |
| 8.02 | 222 | 207 | 132 |
| 8.04 | 205 | 178 | 130 |
| 8.06 | 222 | 203 | 123 |
| 8.08 | 193 | 196 | 143 |
| 8.1  | 232 | 169 | 127 |
| 8.12 | 232 | 201 | 126 |
| 8.14 | 209 | 197 | 120 |
| 8.16 | 207 | 168 | 122 |
| 8.18 | 196 | 187 | 109 |
| 8.2  | 189 | 198 | 119 |
| 8.22 | 196 | 182 | 122 |
| 8.24 | 206 | 212 | 123 |
| 8.26 | 229 | 173 | 122 |
| 8.28 | 206 | 179 | 116 |
| 8.3  | 231 | 173 | 115 |
| 8.32 | 215 | 216 | 132 |
| 8.34 | 206 | 183 | 141 |
| 8.36 | 202 | 194 | 137 |
| 8.38 | 200 | 174 | 102 |
| 8.4  | 183 | 155 | 109 |
| 8.42 | 204 | 157 | 109 |
| 8.44 | 221 | 171 | 126 |
| 8.46 | 203 | 185 | 124 |
| 8.48 | 198 | 168 | 144 |
| 8.5  | 209 | 193 | 104 |
| 8.52 | 211 | 170 | 113 |
| 8.54 | 193 | 174 | 115 |
| 8.56 | 224 | 168 | 120 |
| 8.58 | 209 | 171 | 115 |
| 8.6  | 195 | 176 | 124 |
| 8.62 | 204 | 176 | 112 |
| 8.64 | 206 | 184 | 121 |
| 8.66 | 205 | 156 | 115 |
| 8.68 | 207 | 190 | 117 |
| 8.7  | 206 | 196 | 101 |
| 8.72 | 209 | 186 | 116 |
| 8.74 | 195 | 206 | 108 |
| 8.76 | 222 | 171 | 118 |
| 8.78 | 181 | 166 | 125 |

|      |     |     |     |
|------|-----|-----|-----|
| 8.8  | 191 | 160 | 124 |
| 8.82 | 186 | 178 | 125 |
| 8.84 | 192 | 161 | 119 |
| 8.86 | 203 | 156 | 120 |
| 8.88 | 216 | 174 | 140 |
| 8.9  | 198 | 174 | 109 |
| 8.92 | 173 | 178 | 102 |
| 8.94 | 183 | 169 | 120 |
| 8.96 | 186 | 175 | 108 |
| 8.98 | 202 | 173 | 131 |
| 9    | 184 | 181 | 118 |
| 9.02 | 199 | 187 | 115 |
| 9.04 | 202 | 181 | 137 |
| 9.06 | 206 | 189 | 123 |
| 9.08 | 175 | 154 | 109 |
| 9.1  | 201 | 181 | 106 |
| 9.12 | 180 | 170 | 130 |
| 9.14 | 216 | 152 | 114 |
| 9.16 | 197 | 181 | 119 |
| 9.18 | 178 | 164 | 135 |
| 9.2  | 218 | 191 | 114 |
| 9.22 | 200 | 157 | 118 |
| 9.24 | 211 | 188 | 109 |
| 9.26 | 210 | 164 | 132 |
| 9.28 | 227 | 180 | 137 |
| 9.3  | 213 | 186 | 122 |
| 9.32 | 196 | 169 | 126 |
| 9.34 | 213 | 169 | 121 |
| 9.36 | 216 | 179 | 120 |
| 9.38 | 209 | 187 | 122 |
| 9.4  | 201 | 196 | 131 |
| 9.42 | 205 | 149 | 136 |
| 9.44 | 211 | 174 | 125 |
| 9.46 | 193 | 165 | 127 |
| 9.48 | 203 | 158 | 142 |
| 9.5  | 218 | 195 | 138 |
| 9.52 | 213 | 172 | 113 |
| 9.54 | 223 | 168 | 140 |
| 9.56 | 224 | 156 | 121 |
| 9.58 | 244 | 192 | 104 |
| 9.6  | 250 | 204 | 125 |
| 9.62 | 219 | 185 | 138 |
| 9.64 | 235 | 205 | 114 |
| 9.66 | 214 | 165 | 130 |
| 9.68 | 206 | 203 | 117 |
| 9.7  | 230 | 172 | 110 |
| 9.72 | 218 | 170 | 117 |
| 9.74 | 218 | 177 | 122 |
| 9.76 | 218 | 189 | 125 |

|       |      |     |      |     |     |      |     |
|-------|------|-----|------|-----|-----|------|-----|
| 9.78  | 223  | 183 |      |     |     | 146  |     |
| 9.8   | 192  | 192 |      |     |     | 112  |     |
| 9.82  | 220  | 191 |      |     |     | 136  |     |
| 9.84  | 203  | 215 |      |     |     | 114  |     |
| 9.86  | 213  | 205 |      |     |     | 129  |     |
| 9.88  | 227  | 194 |      |     |     | 115  |     |
| 9.9   | 242  | 194 |      |     |     | 142  |     |
| 9.92  | 233  | 200 |      |     |     | 125  |     |
| 9.94  | 219  | 190 |      |     |     | 140  |     |
| 9.96  | 232  | 177 |      |     |     | 131  |     |
| 9.98  | 280  | 211 |      |     |     | 150  |     |
| 10    | 252  | 199 | 229  | 1   | 130 | 139  | 94  |
| 10.02 | 232  | 170 | 195  | 5   | 111 | 160  | 123 |
| 10.04 | 235  | 199 | 257  | 2   | 123 | 165  | 109 |
| 10.06 | 234  | 191 | 230  | 4   | 122 | 171  | 128 |
| 10.08 | 219  | 187 | 210  | 6   | 138 | 167  | 121 |
| 10.1  | 232  | 202 | 237  | 12  | 112 | 153  | 142 |
| 10.12 | 256  | 212 | 270  | 23  | 124 | 208  | 141 |
| 10.14 | 233  | 232 | 237  | 31  | 116 | 156  | 136 |
| 10.16 | 293  | 235 | 255  | 46  | 139 | 196  | 133 |
| 10.18 | 267  | 234 | 242  | 51  | 138 | 235  | 143 |
| 10.2  | 271  | 219 | 293  | 66  | 142 | 244  | 150 |
| 10.22 | 300  | 250 | 280  | 75  | 142 | 304  | 163 |
| 10.24 | 324  | 225 | 272  | 108 | 124 | 274  | 148 |
| 10.26 | 350  | 238 | 322  | 111 | 136 | 334  | 133 |
| 10.28 | 345  | 250 | 332  | 119 | 150 | 376  | 137 |
| 10.3  | 379  | 256 | 338  | 127 | 145 | 399  | 136 |
| 10.32 | 436  | 244 | 395  | 159 | 134 | 520  | 150 |
| 10.34 | 458  | 289 | 374  | 187 | 139 | 631  | 160 |
| 10.36 | 480  | 329 | 422  | 209 | 157 | 769  | 137 |
| 10.38 | 515  | 329 | 475  | 231 | 164 | 910  | 166 |
| 10.4  | 595  | 319 | 513  | 306 | 178 | 1146 | 140 |
| 10.42 | 664  | 390 | 535  | 321 | 204 | 1294 | 135 |
| 10.44 | 725  | 406 | 637  | 348 | 208 | 1404 | 143 |
| 10.46 | 846  | 410 | 729  | 389 | 208 | 1345 | 123 |
| 10.48 | 1069 | 458 | 803  | 397 | 217 | 1155 | 125 |
| 10.5  | 1228 | 486 | 916  | 405 | 199 | 918  | 131 |
| 10.52 | 1524 | 531 | 1093 | 379 | 192 | 628  | 128 |
| 10.54 | 1908 | 554 | 1207 | 298 | 177 | 380  | 137 |
| 10.56 | 2259 | 601 | 1412 | 300 | 178 | 296  | 134 |
| 10.58 | 2353 | 640 | 1581 | 290 | 159 | 226  | 115 |
| 10.6  | 2272 | 764 | 1719 | 273 | 142 | 190  | 139 |
| 10.62 | 1881 | 795 | 1790 | 285 | 153 | 221  | 134 |
| 10.64 | 1547 | 847 | 1768 | 247 | 109 | 203  | 130 |
| 10.66 | 1138 | 815 | 1639 | 266 | 127 | 244  | 119 |
| 10.68 | 754  | 774 | 1617 | 278 | 126 | 260  | 153 |
| 10.7  | 567  | 667 | 1365 | 310 | 115 | 234  | 128 |
| 10.72 | 446  | 577 | 1106 | 278 | 142 | 281  | 122 |
| 10.74 | 407  | 461 | 810  | 312 | 125 | 310  | 134 |

|       |     |     |     |     |     |     |     |
|-------|-----|-----|-----|-----|-----|-----|-----|
| 10.76 | 408 | 360 | 656 | 352 | 111 | 317 | 115 |
| 10.78 | 396 | 342 | 507 | 345 | 123 | 330 | 139 |
| 10.8  | 405 | 325 | 395 | 322 | 110 | 297 | 130 |
| 10.82 | 368 | 331 | 386 | 373 | 126 | 274 | 123 |
| 10.84 | 433 | 331 | 409 | 326 | 128 | 249 | 101 |
| 10.86 | 486 | 297 | 420 | 342 | 117 | 226 | 118 |
| 10.88 | 578 | 299 | 457 | 303 | 123 | 181 | 129 |
| 10.9  | 594 | 325 | 434 | 301 | 132 | 151 | 132 |
| 10.92 | 617 | 308 | 454 | 262 | 142 | 150 | 138 |
| 10.94 | 556 | 351 | 481 | 258 | 115 | 143 | 119 |
| 10.96 | 541 | 395 | 511 | 224 | 109 | 125 | 130 |
| 10.98 | 494 | 386 | 465 | 222 | 113 | 143 | 140 |
| 11    | 414 | 397 | 522 | 205 | 112 | 148 | 112 |
| 11.02 | 343 | 328 | 460 | 229 | 133 | 119 | 129 |
| 11.04 | 280 | 355 | 431 | 230 | 132 | 144 | 133 |
| 11.06 | 289 | 285 | 385 | 204 | 127 | 128 | 158 |
| 11.08 | 318 | 243 | 362 | 249 | 131 | 124 | 131 |
| 11.1  | 299 | 236 | 301 | 200 | 117 | 142 | 156 |
| 11.12 | 320 | 205 | 263 | 214 | 134 | 120 | 124 |
| 11.14 | 340 | 227 | 250 | 223 | 115 | 138 | 127 |
| 11.16 | 340 | 212 | 285 | 225 | 127 | 119 | 156 |
| 11.18 | 390 | 209 | 266 | 208 | 122 | 114 | 158 |
| 11.2  | 433 | 220 | 265 | 240 | 135 | 116 | 160 |
| 11.22 | 459 | 222 | 284 | 208 | 125 | 127 | 109 |
| 11.24 | 413 | 233 | 292 | 173 | 139 | 126 | 145 |
| 11.26 | 401 | 227 | 314 | 199 | 119 | 133 | 147 |
| 11.28 | 356 | 265 | 334 | 206 | 132 | 131 | 125 |
| 11.3  | 318 | 221 | 331 | 192 | 123 | 121 | 150 |
| 11.32 | 266 | 227 | 326 | 200 | 134 | 106 | 147 |
| 11.34 | 244 | 232 | 302 | 194 | 140 | 123 | 138 |
| 11.36 | 218 | 205 | 308 | 184 | 133 | 108 | 144 |
| 11.38 | 194 | 203 | 276 | 216 | 106 | 110 | 182 |
| 11.4  | 230 | 191 | 218 | 202 | 133 | 123 | 168 |
| 11.42 | 217 | 199 | 192 | 180 | 129 | 114 | 199 |
| 11.44 | 202 | 159 | 229 | 191 | 131 | 120 | 207 |
| 11.46 | 218 | 176 | 181 | 184 | 133 | 113 | 194 |
| 11.48 | 205 | 188 | 195 | 198 | 180 | 118 | 174 |
| 11.5  | 235 | 176 | 197 | 187 | 141 | 127 | 159 |
| 11.52 | 220 | 174 | 187 | 203 | 153 | 130 | 163 |
| 11.54 | 207 | 190 | 181 | 210 | 149 | 107 | 132 |
| 11.56 | 210 | 182 | 173 | 181 | 135 | 128 | 128 |
| 11.58 | 204 | 168 | 209 | 178 | 121 | 123 | 126 |
| 11.6  | 183 | 161 | 190 | 195 | 119 | 135 | 137 |
| 11.62 | 215 | 172 | 182 | 182 | 108 | 110 | 113 |
| 11.64 | 205 | 197 | 205 | 212 | 128 | 128 | 159 |
| 11.66 | 181 | 174 | 192 | 194 | 108 | 131 | 139 |
| 11.68 | 195 | 154 | 176 | 209 | 123 | 125 | 121 |
| 11.7  | 204 | 162 | 187 | 162 | 121 | 131 | 130 |
| 11.72 | 199 | 178 | 186 | 205 | 117 | 122 | 129 |

|       |     |     |     |     |     |     |     |
|-------|-----|-----|-----|-----|-----|-----|-----|
| 11.74 | 221 | 157 | 167 | 186 | 118 | 123 | 164 |
| 11.76 | 185 | 168 | 166 | 180 | 105 | 139 | 147 |
| 11.78 | 204 | 184 | 158 | 213 | 146 | 133 | 163 |
| 11.8  | 197 | 167 | 184 | 203 | 124 | 122 | 166 |
| 11.82 | 190 | 163 | 170 | 199 | 116 | 112 | 141 |
| 11.84 | 188 | 147 | 171 | 176 | 133 | 108 | 163 |
| 11.86 | 155 | 146 | 175 | 166 | 124 | 120 | 161 |
| 11.88 | 189 | 159 | 175 | 199 | 124 | 133 | 162 |
| 11.9  | 175 | 164 | 167 | 198 | 125 | 124 | 197 |
| 11.92 | 167 | 184 | 188 | 205 | 127 | 134 | 193 |
| 11.94 | 188 | 148 | 189 | 177 | 141 | 113 | 199 |
| 11.96 | 207 | 158 | 167 | 207 | 141 | 143 | 194 |
| 11.98 | 167 | 176 | 172 | 199 | 147 | 126 | 201 |
| 12    | 163 | 140 | 182 | 182 | 150 | 137 | 211 |
| 12.02 | 182 | 163 | 182 | 204 | 132 | 108 | 239 |
| 12.04 | 189 | 170 | 170 | 202 | 161 | 115 | 260 |
| 12.06 | 244 | 181 | 168 | 215 | 181 | 130 | 309 |
| 12.08 | 190 | 160 | 182 | 211 | 152 | 132 | 346 |
| 12.1  | 212 | 166 | 169 | 210 | 181 | 141 | 380 |
| 12.12 | 203 | 183 | 170 | 212 | 174 | 116 | 380 |
| 12.14 | 215 | 185 | 162 | 225 | 171 | 142 | 430 |
| 12.16 | 249 | 164 | 162 | 249 | 180 | 116 | 471 |
| 12.18 | 217 | 163 | 189 | 250 | 206 | 121 | 551 |
| 12.2  | 226 | 152 | 181 | 235 | 201 | 132 | 658 |
| 12.22 | 252 | 143 | 186 | 237 | 254 | 114 | 736 |
| 12.24 | 235 | 165 | 194 | 233 | 265 | 107 | 852 |
| 12.26 | 225 | 176 | 158 | 255 | 328 | 134 | 935 |
| 12.28 | 246 | 167 | 164 | 274 | 386 | 114 | 851 |
| 12.3  | 250 | 166 | 178 | 281 | 487 | 129 | 767 |
| 12.32 | 269 | 187 | 152 | 302 | 567 | 118 | 668 |
| 12.34 | 291 | 184 | 172 | 322 | 633 | 134 | 482 |
| 12.36 | 307 | 205 | 199 | 307 | 686 | 138 | 345 |
| 12.38 | 328 | 208 | 165 | 324 | 667 | 126 | 235 |
| 12.4  | 331 | 201 | 166 | 287 | 610 | 147 | 184 |
| 12.42 | 384 | 218 | 203 | 264 | 505 | 137 | 174 |
| 12.44 | 378 | 194 | 199 | 245 | 412 | 132 | 158 |
| 12.46 | 351 | 180 | 179 | 218 | 276 | 108 | 135 |
| 12.48 | 359 | 210 | 148 | 174 | 211 | 131 | 162 |
| 12.5  | 348 | 221 | 178 | 195 | 188 | 128 | 146 |
| 12.52 | 291 | 207 | 178 | 193 | 154 | 122 | 160 |
| 12.54 | 242 | 183 | 154 | 200 | 143 | 124 | 155 |
| 12.56 | 198 | 195 | 172 | 192 | 159 | 120 | 137 |
| 12.58 | 204 | 178 | 179 | 187 | 155 | 128 | 149 |
| 12.6  | 222 | 170 | 186 | 205 | 116 | 115 | 143 |
| 12.62 | 201 | 180 | 200 | 189 | 129 | 134 | 140 |
| 12.64 | 181 | 175 | 166 | 183 | 126 | 119 | 130 |
| 12.66 | 208 | 162 | 173 | 199 | 145 | 117 | 140 |
| 12.68 | 198 | 183 | 190 | 199 | 121 | 124 | 141 |
| 12.7  | 208 | 190 | 199 | 180 | 125 | 139 | 122 |

|       |     |     |     |     |     |     |     |
|-------|-----|-----|-----|-----|-----|-----|-----|
| 12.72 | 204 | 182 | 178 | 196 | 145 | 125 | 152 |
| 12.74 | 225 | 178 | 180 | 180 | 149 | 136 | 137 |
| 12.76 | 225 | 176 | 183 | 199 | 131 | 125 | 115 |
| 12.78 | 192 | 162 | 188 | 199 | 116 | 141 | 142 |
| 12.8  | 205 | 151 | 192 | 212 | 145 | 125 | 131 |
| 12.82 | 206 | 184 | 175 | 202 | 129 | 134 | 124 |
| 12.84 | 212 | 189 | 188 | 200 | 118 | 120 | 125 |
| 12.86 | 216 | 161 | 155 | 208 | 124 | 109 | 139 |
| 12.88 | 206 | 177 | 149 | 213 | 128 | 123 | 164 |
| 12.9  | 201 | 192 | 182 | 166 | 141 | 124 | 133 |
| 12.92 | 199 | 156 | 172 | 208 | 133 | 140 | 139 |
| 12.94 | 204 | 153 | 184 | 223 | 140 | 129 | 138 |
| 12.96 | 190 | 184 | 200 | 221 | 124 | 122 | 148 |
| 12.98 | 186 | 162 | 190 | 212 | 139 | 147 | 160 |
| 13    | 238 | 187 | 177 | 203 | 134 | 112 | 125 |
| 13.02 | 175 | 191 | 170 | 198 | 131 | 135 | 122 |
| 13.04 | 212 | 158 | 175 | 199 | 100 | 124 | 146 |
| 13.06 | 191 | 169 | 167 | 210 | 146 | 110 | 127 |
| 13.08 | 203 | 187 | 174 | 207 | 134 | 119 | 129 |
| 13.1  | 206 | 190 | 178 | 184 | 136 | 141 | 132 |
| 13.12 | 192 | 183 | 189 | 215 | 154 | 130 | 160 |
| 13.14 | 224 | 164 | 183 | 229 | 137 | 145 | 150 |
| 13.16 | 205 | 193 | 168 | 221 | 117 | 158 | 126 |
| 13.18 | 213 | 214 | 177 | 229 | 135 | 148 | 136 |
| 13.2  | 221 | 177 | 206 | 200 | 126 | 151 | 139 |
| 13.22 | 244 | 182 | 193 | 227 | 136 | 139 | 154 |
| 13.24 | 209 | 192 | 197 | 227 | 144 | 160 | 168 |
| 13.26 | 230 | 192 | 203 | 219 | 136 | 141 | 154 |
| 13.28 | 224 | 195 | 194 | 218 | 130 | 148 | 150 |
| 13.3  | 236 | 184 | 181 | 210 | 126 | 143 | 136 |
| 13.32 | 218 | 188 | 206 | 226 | 113 | 157 | 112 |
| 13.34 | 211 | 194 | 189 | 209 | 138 | 140 | 143 |
| 13.36 | 220 | 218 | 193 | 239 | 123 | 169 | 150 |
| 13.38 | 231 | 203 | 215 | 197 | 125 | 142 | 152 |
| 13.4  | 249 | 198 | 209 | 219 | 137 | 134 | 138 |
| 13.42 | 254 | 201 | 216 | 219 | 128 | 134 | 146 |
| 13.44 | 208 | 197 | 216 | 219 | 121 | 134 | 148 |
| 13.46 | 239 | 214 | 210 | 242 | 154 | 134 | 137 |
| 13.48 | 239 | 187 | 220 | 215 | 139 | 145 | 131 |
| 13.5  | 255 | 185 | 232 | 227 | 136 | 141 | 139 |
| 13.52 | 234 | 193 | 210 | 223 | 129 | 129 | 156 |
| 13.54 | 239 | 177 | 223 | 202 | 114 | 164 | 140 |
| 13.56 | 258 | 215 | 233 | 244 | 128 | 136 | 143 |
| 13.58 | 265 | 189 | 253 | 231 | 134 | 148 | 146 |
| 13.6  | 241 | 234 | 250 | 250 | 126 | 140 | 142 |
| 13.62 | 230 | 203 | 231 | 274 | 116 | 145 | 144 |
| 13.64 | 238 | 209 | 222 | 277 | 135 | 124 | 134 |
| 13.66 | 257 | 199 | 229 | 291 | 123 | 131 | 139 |
| 13.68 | 213 | 188 | 239 | 328 | 143 | 139 | 141 |

|       |      |     |     |     |     |      |     |
|-------|------|-----|-----|-----|-----|------|-----|
| 13.7  | 240  | 216 | 224 | 288 | 117 | 152  | 146 |
| 13.72 | 231  | 213 | 231 | 308 | 141 | 142  | 131 |
| 13.74 | 263  | 235 | 214 | 277 | 123 | 139  | 152 |
| 13.76 | 253  | 249 | 275 | 241 | 126 | 160  | 144 |
| 13.78 | 218  | 231 | 264 | 277 | 133 | 150  | 138 |
| 13.8  | 243  | 236 | 300 | 242 | 112 | 119  | 147 |
| 13.82 | 222  | 246 | 306 | 265 | 110 | 118  | 145 |
| 13.84 | 249  | 216 | 383 | 224 | 127 | 152  | 136 |
| 13.86 | 245  | 253 | 447 | 220 | 143 | 140  | 125 |
| 13.88 | 271  | 221 | 406 | 223 | 128 | 160  | 151 |
| 13.9  | 275  | 238 | 460 | 196 | 142 | 150  | 134 |
| 13.92 | 276  | 235 | 437 | 220 | 121 | 139  | 145 |
| 13.94 | 256  | 240 | 344 | 190 | 133 | 133  | 168 |
| 13.96 | 289  | 243 | 318 | 238 | 132 | 160  | 171 |
| 13.98 | 286  | 227 | 244 | 245 | 145 | 168  | 141 |
| 14    | 293  | 227 | 249 | 271 | 126 | 143  | 158 |
| 14.02 | 272  | 230 | 227 | 262 | 128 | 148  | 151 |
| 14.04 | 283  | 266 | 218 | 277 | 136 | 148  | 156 |
| 14.06 | 305  | 249 | 218 | 267 | 125 | 150  | 176 |
| 14.08 | 288  | 248 | 222 | 275 | 150 | 158  | 159 |
| 14.1  | 307  | 258 | 204 | 279 | 145 | 167  | 144 |
| 14.12 | 331  | 279 | 219 | 270 | 123 | 168  | 154 |
| 14.14 | 284  | 274 | 236 | 267 | 136 | 170  | 143 |
| 14.16 | 311  | 275 | 258 | 271 | 155 | 176  | 169 |
| 14.18 | 328  | 241 | 240 | 283 | 125 | 169  | 173 |
| 14.2  | 348  | 258 | 211 | 307 | 139 | 191  | 162 |
| 14.22 | 331  | 285 | 251 | 319 | 155 | 204  | 169 |
| 14.24 | 342  | 281 | 255 | 313 | 137 | 187  | 142 |
| 14.26 | 363  | 299 | 233 | 360 | 151 | 201  | 166 |
| 14.28 | 362  | 314 | 258 | 371 | 133 | 206  | 151 |
| 14.3  | 384  | 318 | 263 | 365 | 149 | 236  | 175 |
| 14.32 | 400  | 313 | 273 | 373 | 163 | 225  | 174 |
| 14.34 | 427  | 329 | 261 | 353 | 148 | 252  | 176 |
| 14.36 | 405  | 354 | 271 | 358 | 155 | 254  | 179 |
| 14.38 | 468  | 354 | 315 | 328 | 147 | 279  | 127 |
| 14.4  | 441  | 371 | 315 | 384 | 155 | 303  | 198 |
| 14.42 | 481  | 338 | 354 | 389 | 170 | 364  | 170 |
| 14.44 | 468  | 376 | 337 | 360 | 163 | 404  | 203 |
| 14.46 | 549  | 416 | 362 | 370 | 152 | 441  | 217 |
| 14.48 | 574  | 416 | 364 | 424 | 178 | 456  | 202 |
| 14.5  | 544  | 413 | 430 | 419 | 166 | 599  | 236 |
| 14.52 | 582  | 404 | 416 | 472 | 160 | 657  | 247 |
| 14.54 | 588  | 417 | 442 | 503 | 170 | 729  | 260 |
| 14.56 | 659  | 420 | 465 | 533 | 167 | 950  | 258 |
| 14.58 | 764  | 475 | 510 | 537 | 168 | 1201 | 307 |
| 14.6  | 769  | 444 | 548 | 600 | 205 | 1437 | 305 |
| 14.62 | 843  | 490 | 619 | 668 | 208 | 1748 | 315 |
| 14.64 | 873  | 502 | 721 | 694 | 225 | 2124 | 308 |
| 14.66 | 1006 | 525 | 784 | 754 | 228 | 2233 | 320 |

|       |      |     |      |     |     |      |     |
|-------|------|-----|------|-----|-----|------|-----|
| 14.68 | 1169 | 587 | 860  | 791 | 242 | 2192 | 280 |
| 14.7  | 1279 | 665 | 1043 | 826 | 251 | 2082 | 197 |
| 14.72 | 1557 | 646 | 1194 | 714 | 243 | 1835 | 189 |
| 14.74 | 1805 | 652 | 1435 | 710 | 242 | 1259 | 154 |
| 14.76 | 2133 | 767 | 1674 | 577 | 227 | 856  | 159 |
| 14.78 | 2403 | 817 | 1984 | 448 | 172 | 569  | 153 |
| 14.8  | 2400 | 867 | 2227 | 398 | 188 | 371  | 156 |
| 14.82 | 2398 | 878 | 2414 | 311 | 142 | 286  | 156 |
| 14.84 | 1998 | 951 | 2587 | 261 | 125 | 233  | 159 |
| 14.86 | 1551 | 878 | 2655 | 275 | 136 | 218  | 137 |
| 14.88 | 1121 | 923 | 2561 | 272 | 135 | 215  | 152 |
| 14.9  | 708  | 931 | 2419 | 228 | 117 | 203  | 145 |
| 14.92 | 550  | 805 | 2134 | 215 | 131 | 183  | 143 |
| 14.94 | 432  | 669 | 1810 | 208 | 131 | 191  | 140 |
| 14.96 | 380  | 497 | 1355 | 226 | 138 | 188  | 170 |
| 14.98 | 344  | 402 | 934  | 203 | 120 | 186  | 125 |
| 15    | 326  | 326 | 669  | 206 | 130 | 170  | 152 |
| 15.02 | 312  | 292 | 416  | 203 | 128 | 171  | 156 |
| 15.04 | 293  | 287 | 369  | 216 | 133 | 186  | 150 |
| 15.06 | 264  | 229 | 314  | 206 | 127 | 145  | 136 |
| 15.08 | 272  | 243 | 304  | 196 | 121 | 153  | 152 |
| 15.1  | 298  | 235 | 289  | 206 | 129 | 163  | 143 |
| 15.12 | 281  | 209 | 278  | 196 | 100 | 150  | 125 |
| 15.14 | 271  | 279 | 258  | 198 | 114 | 177  | 156 |
| 15.16 | 221  | 255 | 265  | 201 | 127 | 151  | 120 |
| 15.18 | 276  | 179 | 243  | 182 | 134 | 146  | 135 |
| 15.2  | 228  | 239 | 235  | 197 | 155 | 140  | 135 |
| 15.22 | 233  | 203 | 246  | 187 | 129 | 171  | 135 |
| 15.24 | 250  | 229 | 264  | 190 | 110 | 149  | 133 |
| 15.26 | 225  | 171 | 199  | 190 | 135 | 145  | 135 |
| 15.28 | 230  | 190 | 233  | 190 | 130 | 141  | 155 |
| 15.3  | 229  | 187 | 212  | 176 | 116 | 173  | 129 |
| 15.32 | 222  | 183 | 205  | 181 | 130 | 147  | 148 |
| 15.34 | 186  | 206 | 204  | 171 | 150 | 153  | 135 |
| 15.36 | 203  | 184 | 206  | 216 | 135 | 162  | 130 |
| 15.38 | 208  | 180 | 236  | 195 | 132 | 145  | 152 |
| 15.4  | 208  | 177 | 209  | 181 | 137 | 137  | 143 |
| 15.42 | 220  | 157 | 209  | 188 | 125 | 135  | 164 |
| 15.44 | 189  | 178 | 189  | 188 | 122 | 134  | 153 |
| 15.46 | 176  | 175 | 183  | 164 | 134 | 157  | 147 |
| 15.48 | 195  | 178 | 220  | 170 | 136 | 143  | 141 |
| 15.5  | 236  | 191 | 174  | 186 | 139 | 148  | 167 |
| 15.52 | 189  | 192 | 178  | 187 | 120 | 150  | 128 |
| 15.54 | 179  | 178 | 181  | 196 | 128 | 142  | 146 |
| 15.56 | 197  | 165 | 201  | 191 | 140 | 133  | 141 |
| 15.58 | 190  | 171 | 196  | 195 | 141 | 130  | 137 |
| 15.6  | 197  | 180 | 187  | 197 | 110 | 138  | 116 |
| 15.62 | 172  | 184 | 184  | 182 | 130 | 136  | 153 |
| 15.64 | 193  | 184 | 185  | 174 | 112 | 152  | 152 |
